# Supplementary material
Source: publisher figshare collection journal article supplement (https://acs.figshare.com/ndownloader/files/3858730)
Supplement: Supplementary file 1 [file 3858730]

 
data_xx 
 
_audit_creation_method            SHELXL-97 
_chemical_name_systematic 
; 
 ? 
; 
_chemical_name_common             ? 
_chemical_melting_point           ? 
_chemical_formula_moiety          'Ca2 Co2 O5' 
_chemical_formula_sum 
 'Ca2 Co2 O5' 
_chemical_formula_weight          278.02 
 
loop_ 
 _atom_type_symbol 
 _atom_type_description 
 _atom_type_scat_dispersion_real 
 _atom_type_scat_dispersion_imag 
 _atom_type_scat_source 
 'O'  'O'   0.0106   0.0060 
 'International Tables Vol C Tables 4.2.6.8 and 6.1.1.4' 
 'Ca'  'Ca'   0.2262   0.3064 
 'International Tables Vol C Tables 4.2.6.8 and 6.1.1.4' 
 'Co'  'Co'   0.3494   0.9721 
 'International Tables Vol C Tables 4.2.6.8 and 6.1.1.4' 
 
_symmetry_cell_setting           'Monoclinic' 
_symmetry_space_group_name_H-M    'P1 21/m 1' 
 
loop_ 
 _symmetry_equiv_pos_as_xyz 
 'x, y, z' 
 '-x, y+1/2, -z' 
 '-x, -y, -z' 
 'x, -y-1/2, z' 
 
_cell_length_a                    5.30280(10) 
_cell_length_b                    14.7838(3) 
_cell_length_c                    10.9810(2) 
_cell_angle_alpha                 90.00 
_cell_angle_beta                  90.1730(10) 
_cell_angle_gamma                 90.00 
_cell_volume                      860.86(3) 
_cell_formula_units_Z             8 
_cell_measurement_temperature     200(2) 
_cell_measurement_reflns_used     4069
_cell_measurement_theta_min        2.76
_cell_measurement_theta_max       31.46 
 
_exptl_crystal_description        block 
_exptl_crystal_colour             black
_exptl_crystal_size_max           0.06 
_exptl_crystal_size_mid           0.05 
_exptl_crystal_size_min           0.05 
_exptl_crystal_density_meas       ? 
_exptl_crystal_density_diffrn     4.290 
_exptl_crystal_density_method     'not measured' 
_exptl_crystal_F_000              1072 
_exptl_absorpt_coefficient_mu     10.002 
_exptl_absorpt_correction_type    multi-scan 
_exptl_absorpt_correction_T_min   0.4131 
_exptl_absorpt_correction_T_max   0.4942 
_exptl_absorpt_process_details    'SADABS (Sheldrick, 2003)'  
 
_exptl_special_details 
; 
 ? 
; 
 
_diffrn_ambient_temperature       200(2) 
_diffrn_radiation_wavelength      0.71073 
_diffrn_radiation_type            MoK\a 
_diffrn_radiation_source          'fine-focus sealed tube' 
_diffrn_radiation_monochromator   graphite 
_diffrn_measurement_device_type   'Bruker APEX-II CCD'
_diffrn_measurement_method        '\f and \w scans'
_diffrn_detector_area_resol_mean  ?
_diffrn_standards_number          0
_diffrn_standards_interval_count  ?
_diffrn_standards_decay_%         ? 
_diffrn_reflns_number             11770 
_diffrn_reflns_av_R_equivalents   0.0310 
_diffrn_reflns_av_sigmaI/netI     0.0281 
_diffrn_reflns_limit_h_min        -7 
_diffrn_reflns_limit_h_max        7 
_diffrn_reflns_limit_k_min        -21 
_diffrn_reflns_limit_k_max        21 
_diffrn_reflns_limit_l_min        -16 
_diffrn_reflns_limit_l_max        16 
_diffrn_reflns_theta_min          1.85 
_diffrn_reflns_theta_max          31.50 
_reflns_number_total              2939 
_reflns_number_gt                 1762 
_reflns_threshold_expression      >2sigma(I) 
 
_computing_data_collection       'Bruker APEX2'
_computing_cell_refinement       'Bruker SAINT'
_computing_data_reduction        'Bruker SAINT' 
_computing_structure_solution    'SHELXS-97 (Sheldrick, 2008)'
_computing_structure_refinement  'SHELXL-97 (Sheldrick, 2008)'
_computing_molecular_graphics    'Bruker SHELXTL'
_computing_publication_material  'Bruker SHELXTL'
 
_refine_special_details 
; 
 Refinement of F^2^ against ALL reflections.  The weighted R-factor wR and 
 goodness of fit S are based on F^2^, conventional R-factors R are based 
 on F, with F set to zero for negative F^2^. The threshold expression of 
 F^2^ > 2sigma(F^2^) is used only for calculating R-factors(gt) etc. and is 
 not relevant to the choice of reflections for refinement.  R-factors based 
 on F^2^ are statistically about twice as large as those based on F, and R- 
 factors based on ALL data will be even larger. 
; 
 
_refine_ls_structure_factor_coef  Fsqd  
_refine_ls_matrix_type            full 
_refine_ls_weighting_scheme       calc  
_refine_ls_weighting_details 
 'calc w=1/[\s^2^(Fo^2^)+(0.0367P)^2^+0.0000P] where P=(Fo^2^+2Fc^2^)/3' 
_atom_sites_solution_primary      direct 
_atom_sites_solution_secondary    difmap 
_atom_sites_solution_hydrogens    ?
_refine_ls_hydrogen_treatment     ?
_refine_ls_extinction_method      none 
_refine_ls_extinction_coef        ? 
_refine_ls_number_reflns          2939 
_refine_ls_number_parameters      178 
_refine_ls_number_restraints      0 
_refine_ls_R_factor_all           0.0528 
_refine_ls_R_factor_gt            0.0265 
_refine_ls_wR_factor_ref          0.0760 
_refine_ls_wR_factor_gt           0.0655 
_refine_ls_goodness_of_fit_ref    0.984 
_refine_ls_restrained_S_all       0.984 
_refine_ls_shift/su_max           0.000 
_refine_ls_shift/su_mean          0.000 
 
loop_ 
 _atom_site_label 
 _atom_site_type_symbol 
 _atom_site_fract_x 
 _atom_site_fract_y 
 _atom_site_fract_z 
 _atom_site_U_iso_or_equiv 
 _atom_site_adp_type 
 _atom_site_occupancy 
 _atom_site_symmetry_multiplicity 
 _atom_site_calc_flag 
 _atom_site_refinement_flags 
 _atom_site_disorder_assembly 
 _atom_site_disorder_group 
Ca1 Ca 0.02046(13) 0.10786(6) 0.26037(8) 0.00803(17) Uani 1 1 d . . . 
Ca2 Ca 0.02025(14) 0.60780(5) 0.24053(8) 0.00818(17) Uani 1 1 d . . . 
Ca3 Ca 0.48996(14) 0.60809(6) 0.01022(8) 0.00827(17) Uani 1 1 d . . . 
Ca4 Ca 0.48982(13) 0.10778(6) 0.49039(8) 0.00807(17) Uani 1 1 d . . . 
Co1 Co 0.44541(11) 0.2500 0.71906(6) 0.00712(14) Uani 1 2 d S . . 
Co2 Co 0.55479(11) 0.2500 0.21948(6) 0.00752(14) Uani 1 2 d S . . 
Co3 Co 0.04616(11) 0.2500 0.02967(6) 0.00754(15) Uani 1 2 d S . . 
Co4 Co 0.95280(11) 0.2500 0.52993(6) 0.00747(15) Uani 1 2 d S . . 
Co5 Co 0.0000 0.0000 0.5000 0.00582(17) Uani 1 2 d S . . 
Co6 Co 0.0000 0.0000 0.0000 0.00612(17) Uani 1 2 d S . . 
Co7 Co 0.51120(6) 0.00014(2) 0.25026(3) 0.00556(15) Uani 1 1 d . . . 
O1 O 0.0878(5) 0.2500 0.6924(3) 0.0078(6) Uani 1 2 d S . . 
O2 O 0.9132(5) 0.2500 0.1927(3) 0.0092(7) Uani 1 2 d S . . 
O3 O 0.5942(5) 0.2500 0.5597(3) 0.0081(6) Uani 1 2 d S . . 
O4 O 0.4056(5) 0.2500 0.0593(3) 0.0092(7) Uani 1 2 d S . . 
O5 O 0.0217(5) 0.1394(2) 0.4703(3) 0.0121(6) Uani 1 1 d . . . 
O6 O 0.0234(5) 0.6402(2) 0.0308(3) 0.0110(6) Uani 1 1 d . . . 
O7 O 0.4971(5) 0.6382(2) 0.2206(3) 0.0123(6) Uani 1 1 d . . . 
O8 O 0.4963(5) 0.1386(2) 0.2806(3) 0.0128(7) Uani 1 1 d . . . 
O9 O 0.2382(4) 0.00985(15) 0.6263(3) 0.0088(4) Uani 1 1 d . . . 
O10 O 0.7639(4) 0.01029(15) 0.1255(3) 0.0091(4) Uani 1 1 d . . . 
O11 O 0.2620(4) 0.51459(15) 0.3765(3) 0.0091(4) Uani 1 1 d . . . 
O12 O 0.2664(4) 0.01488(15) 0.1255(3) 0.0080(4) Uani 1 1 d . . . 
 
loop_ 
 _atom_site_aniso_label 
 _atom_site_aniso_U_11 
 _atom_site_aniso_U_22 
 _atom_site_aniso_U_33 
 _atom_site_aniso_U_23 
 _atom_site_aniso_U_13 
 _atom_site_aniso_U_12 
Ca1 0.0105(3) 0.0062(4) 0.0074(4) 0.0001(3) -0.0008(2) 0.0001(2) 
Ca2 0.0112(3) 0.0060(4) 0.0074(4) 0.0000(3) -0.0006(2) 0.0005(2) 
Ca3 0.0101(3) 0.0066(4) 0.0081(4) 0.0001(3) -0.0004(2) -0.0004(3) 
Ca4 0.0097(3) 0.0062(4) 0.0083(4) 0.0005(3) -0.0009(2) -0.0006(3) 
Co1 0.0089(3) 0.0053(3) 0.0071(3) 0.000 -0.0002(2) 0.000 
Co2 0.0092(3) 0.0064(3) 0.0069(3) 0.000 -0.0012(2) 0.000 
Co3 0.0096(3) 0.0056(3) 0.0075(3) 0.000 -0.0004(2) 0.000 
Co4 0.0089(3) 0.0059(3) 0.0076(3) 0.000 -0.0008(2) 0.000 
Co5 0.0064(3) 0.0061(4) 0.0050(4) -0.0007(3) -0.0009(2) -0.0001(3) 
Co6 0.0065(3) 0.0067(4) 0.0051(4) -0.0004(3) -0.0007(2) 0.0002(3) 
Co7 0.0058(2) 0.0070(4) 0.0039(4) 0.0003(3) -0.0007(2) -0.0002(2) 
O1 0.0106(14) 0.0038(16) 0.0088(17) 0.000 -0.0044(11) 0.000 
O2 0.0086(14) 0.0093(17) 0.0096(18) 0.000 -0.0006(11) 0.000 
O3 0.0088(14) 0.0054(16) 0.0100(18) 0.000 0.0005(11) 0.000 
O4 0.0114(14) 0.0094(17) 0.0069(17) 0.000 -0.0017(11) 0.000 
O5 0.0137(11) 0.0115(16) 0.0110(16) -0.0023(12) -0.0001(9) 0.0005(10) 
O6 0.0151(11) 0.0096(15) 0.0083(15) 0.0008(12) -0.0004(9) 0.0025(10) 
O7 0.0160(11) 0.0096(16) 0.0112(16) -0.0024(13) 0.0004(9) -0.0026(11) 
O8 0.0163(11) 0.0138(17) 0.0081(16) 0.0042(13) -0.0031(9) -0.0045(11) 
O9 0.0074(9) 0.0111(11) 0.0080(10) 0.0001(14) -0.0012(7) -0.0012(10) 
O10 0.0094(9) 0.0116(11) 0.0062(10) -0.0010(15) 0.0012(7) 0.0024(11) 
O11 0.0100(9) 0.0097(11) 0.0076(10) -0.0022(15) 0.0009(7) -0.0006(10) 
O12 0.0098(9) 0.0085(10) 0.0057(10) -0.0019(14) -0.0023(7) 0.0010(10) 
 
_geom_special_details 
; 
 All esds (except the esd in the dihedral angle between two l.s. planes) 
 are estimated using the full covariance matrix.  The cell esds are taken 
 into account individually in the estimation of esds in distances, angles 
 and torsion angles; correlations between esds in cell parameters are only 
 used when they are defined by crystal symmetry.  An approximate (isotropic) 
 treatment of cell esds is used for estimating esds involving l.s. planes. 
; 
 
loop_ 
 _geom_bond_atom_site_label_1 
 _geom_bond_atom_site_label_2 
 _geom_bond_distance 
 _geom_bond_site_symmetry_2 
 _geom_bond_publ_flag 
Ca1 O2 2.2998(15) 1_455 ? 
Ca1 O5 2.352(3) . ? 
Ca1 O12 2.408(3) . ? 
Ca1 O10 2.473(3) 1_455 ? 
Ca1 O9 2.543(3) 3_556 ? 
Ca1 O11 2.556(3) 4_565 ? 
Ca1 O8 2.573(3) . ? 
Ca1 O8 2.826(3) 1_455 ? 
Ca1 Co7 3.0532(8) . ? 
Ca1 Co5 3.0790(9) . ? 
Ca1 Co7 3.1368(8) 1_455 ? 
Ca1 Ca2 3.1958(14) 4_565 ? 
Ca2 O1 2.3005(16) 3_566 ? 
Ca2 O6 2.352(3) . ? 
Ca2 O11 2.400(3) . ? 
Ca2 O9 2.475(3) 2_556 ? 
Ca2 O10 2.546(3) 4_465 ? 
Ca2 O12 2.569(3) 4_565 ? 
Ca2 O7 2.578(3) . ? 
Ca2 O7 2.818(3) 1_455 ? 
Ca2 Co7 3.0551(8) 4_565 ? 
Ca2 Co6 3.0864(9) 2 ? 
Ca2 Co7 3.1379(8) 4_465 ? 
Ca2 Ca1 3.1957(14) 4_565 ? 
Ca3 O4 2.3008(16) 3_665 ? 
Ca3 O7 2.353(3) . ? 
Ca3 O12 2.408(3) 2_655 ? 
Ca3 O10 2.472(3) 2_655 ? 
Ca3 O12 2.514(3) 4_565 ? 
Ca3 O6 2.530(3) . ? 
Ca3 O10 2.601(3) 4_565 ? 
Ca3 O6 2.876(3) 1_655 ? 
Ca3 Co6 3.0521(8) 2 ? 
Ca3 Co7 3.0853(10) 4_565 ? 
Ca3 Co6 3.1438(8) 2_655 ? 
Ca3 Ca3 3.2058(17) 3_665 ? 
Ca4 O3 2.3031(15) . ? 
Ca4 O8 2.349(3) . ? 
Ca4 O11 2.399(3) 2_646 ? 
Ca4 O9 2.473(3) . ? 
Ca4 O11 2.508(3) 4_565 ? 
Ca4 O5 2.535(3) . ? 
Ca4 O9 2.600(3) 3_656 ? 
Ca4 O5 2.868(3) 1_655 ? 
Ca4 Co5 3.0493(7) . ? 
Ca4 Co7 3.0822(10) . ? 
Ca4 Co5 3.1412(7) 1_655 ? 
Ca4 Ca4 3.1955(17) 3_656 ? 
Co1 O7 1.806(3) 3_666 ? 
Co1 O7 1.806(3) 2_646 ? 
Co1 O1 1.918(3) . ? 
Co1 O3 1.922(3) . ? 
Co1 Ca2 3.2743(9) 2_546 ? 
Co1 Ca2 3.2743(9) 3_566 ? 
Co1 Ca4 3.2840(10) 4_565 ? 
Co1 Ca2 3.5549(9) 3_666 ? 
Co1 Ca2 3.5549(9) 2_646 ? 
Co1 Ca3 3.6538(10) 3_666 ? 
Co1 Ca3 3.6538(10) 2_646 ? 
Co2 O8 1.806(3) . ? 
Co2 O8 1.806(3) 4_565 ? 
Co2 O2 1.924(3) . ? 
Co2 O4 1.926(3) . ? 
Co2 Ca1 3.2723(9) 4_665 ? 
Co2 Ca1 3.2723(9) 1_655 ? 
Co2 Ca3 3.2888(10) 2_645 ? 
Co2 Ca3 3.2888(10) 3_665 ? 
Co2 Ca1 3.5572(9) 4_565 ? 
Co2 Ca4 3.6600(10) 4_565 ? 
Co3 O6 1.792(3) 2_545 ? 
Co3 O6 1.792(3) 3_565 ? 
Co3 O2 1.926(3) 1_455 ? 
Co3 O4 1.933(3) . ? 
Co3 Ca3 3.2635(9) 3_665 ? 
Co3 Ca3 3.2635(9) 2_645 ? 
Co3 Ca1 3.2945(10) 4_565 ? 
Co3 Ca3 3.5592(9) 2_545 ? 
Co3 Ca3 3.5592(9) 3_565 ? 
Co3 Ca2 3.6525(10) 2_545 ? 
Co3 Ca2 3.6525(10) 3_565 ? 
Co4 O5 1.799(3) 1_655 ? 
Co4 O5 1.799(3) 4_665 ? 
Co4 O1 1.920(3) 1_655 ? 
Co4 O3 1.930(3) . ? 
Co4 Ca4 3.2604(9) 4_565 ? 
Co4 Ca2 3.2850(10) 3_666 ? 
Co4 Ca2 3.2850(10) 2_646 ? 
Co4 Ca4 3.5674(9) 4_665 ? 
Co4 Ca4 3.5674(9) 1_655 ? 
Co4 Ca1 3.6487(10) 1_655 ? 
Co4 Ca1 3.6487(10) 4_665 ? 
Co5 O9 1.879(3) 3_556 ? 
Co5 O9 1.879(3) . ? 
Co5 O11 1.957(3) 4_565 ? 
Co5 O11 1.957(3) 2_546 ? 
Co5 O5 2.090(3) . ? 
Co5 O5 2.090(3) 3_556 ? 
Co5 Ca4 3.0493(7) 3_556 ? 
Co5 Ca1 3.0790(9) 3_556 ? 
Co5 Ca4 3.1412(8) 1_455 ? 
Co5 Ca4 3.1412(8) 3_656 ? 
Co6 O10 1.871(3) 3_655 ? 
Co6 O10 1.871(3) 1_455 ? 
Co6 O12 1.983(3) . ? 
Co6 O12 1.983(3) 3 ? 
Co6 O6 2.103(3) 4_565 ? 
Co6 O6 2.103(3) 2_545 ? 
Co6 Ca3 3.0521(8) 2_545 ? 
Co6 Ca3 3.0521(8) 4_565 ? 
Co6 Ca2 3.0864(9) 2_545 ? 
Co6 Ca2 3.0864(9) 4_565 ? 
Co6 Ca3 3.1438(8) 4_465 ? 
Co6 Ca3 3.1438(8) 2_645 ? 
Co7 O12 1.897(3) . ? 
Co7 O9 1.901(3) 3_656 ? 
Co7 O10 1.925(3) . ? 
Co7 O11 1.930(3) 4_565 ? 
Co7 O7 2.072(3) 4_565 ? 
Co7 O8 2.075(3) . ? 
Co7 Ca2 3.0552(8) 4_565 ? 
Co7 Ca3 3.0853(10) 4_565 ? 
Co7 Ca1 3.1368(8) 1_655 ? 
Co7 Ca2 3.1379(8) 4_665 ? 
O1 Co4 1.920(3) 1_455 ? 
O1 Ca2 2.3005(16) 3_566 ? 
O1 Ca2 2.3005(16) 2_546 ? 
O2 Co3 1.926(3) 1_655 ? 
O2 Ca1 2.2998(15) 4_665 ? 
O2 Ca1 2.2998(15) 1_655 ? 
O3 Ca4 2.3031(15) 4_565 ? 
O4 Ca3 2.3008(16) 2_645 ? 
O4 Ca3 2.3008(16) 3_665 ? 
O5 Co4 1.799(3) 1_455 ? 
O5 Ca4 2.868(3) 1_455 ? 
O6 Co3 1.792(3) 3_565 ? 
O6 Co6 2.103(3) 2 ? 
O6 Ca3 2.876(3) 1_455 ? 
O7 Co1 1.806(3) 3_666 ? 
O7 Co7 2.072(3) 4_565 ? 
O7 Ca2 2.818(3) 1_655 ? 
O8 Ca1 2.826(3) 1_655 ? 
O9 Co7 1.901(3) 3_656 ? 
O9 Ca2 2.475(3) 2_546 ? 
O9 Ca1 2.543(3) 3_556 ? 
O9 Ca4 2.600(3) 3_656 ? 
O10 Co6 1.871(3) 1_655 ? 
O10 Ca3 2.472(3) 2_645 ? 
O10 Ca1 2.473(3) 1_655 ? 
O10 Ca2 2.546(3) 4_665 ? 
O10 Ca3 2.601(3) 4_565 ? 
O11 Co7 1.930(3) 4_565 ? 
O11 Co5 1.956(3) 2_556 ? 
O11 Ca4 2.399(3) 2_656 ? 
O11 Ca4 2.508(3) 4_565 ? 
O11 Ca1 2.556(3) 4_565 ? 
O12 Ca3 2.408(3) 2_645 ? 
O12 Ca3 2.514(3) 4_565 ? 
O12 Ca2 2.569(3) 4_565 ? 
 
loop_ 
 _geom_angle_atom_site_label_1 
 _geom_angle_atom_site_label_2 
 _geom_angle_atom_site_label_3 
 _geom_angle 
 _geom_angle_site_symmetry_1 
 _geom_angle_site_symmetry_3 
 _geom_angle_publ_flag 
O2 Ca1 O5 97.77(11) 1_455 . ? 
O2 Ca1 O12 117.18(11) 1_455 . ? 
O5 Ca1 O12 135.77(10) . . ? 
O2 Ca1 O10 101.79(10) 1_455 1_455 ? 
O5 Ca1 O10 134.65(10) . 1_455 ? 
O12 Ca1 O10 66.20(8) . 1_455 ? 
O2 Ca1 O9 130.54(9) 1_455 3_556 ? 
O5 Ca1 O9 69.89(10) . 3_556 ? 
O12 Ca1 O9 101.78(10) . 3_556 ? 
O10 Ca1 O9 66.25(11) 1_455 3_556 ? 
O2 Ca1 O11 158.66(9) 1_455 4_565 ? 
O5 Ca1 O11 69.63(10) . 4_565 ? 
O12 Ca1 O11 68.34(11) . 4_565 ? 
O10 Ca1 O11 99.18(9) 1_455 4_565 ? 
O9 Ca1 O11 62.71(8) 3_556 4_565 ? 
O2 Ca1 O8 96.22(10) 1_455 . ? 
O5 Ca1 O8 83.14(9) . . ? 
O12 Ca1 O8 67.72(9) . . ? 
O10 Ca1 O8 133.82(10) 1_455 . ? 
O9 Ca1 O8 127.50(9) 3_556 . ? 
O11 Ca1 O8 65.93(9) 4_565 . ? 
O2 Ca1 O8 68.66(9) 1_455 1_455 ? 
O5 Ca1 O8 83.73(9) . 1_455 ? 
O12 Ca1 O8 132.44(9) . 1_455 ? 
O10 Ca1 O8 66.50(9) 1_455 1_455 ? 
O9 Ca1 O8 62.58(8) 3_556 1_455 ? 
O11 Ca1 O8 124.48(9) 4_565 1_455 ? 
O8 Ca1 O8 158.37(14) . 1_455 ? 
O2 Ca1 Co7 132.45(8) 1_455 . ? 
O5 Ca1 Co7 98.01(7) . . ? 
O12 Ca1 Co7 38.42(7) . . ? 
O10 Ca1 Co7 98.13(6) 1_455 . ? 
O9 Ca1 Co7 97.00(6) 3_556 . ? 
O11 Ca1 Co7 39.00(7) 4_565 . ? 
O8 Ca1 Co7 42.22(7) . . ? 
O8 Ca1 Co7 157.72(7) 1_455 . ? 
O2 Ca1 Co5 137.74(9) 1_455 . ? 
O5 Ca1 Co5 42.71(8) . . ? 
O12 Ca1 Co5 104.52(7) . . ? 
O10 Ca1 Co5 100.90(7) 1_455 . ? 
O9 Ca1 Co5 37.54(7) 3_556 . ? 
O11 Ca1 Co5 39.27(7) 4_565 . ? 
O8 Ca1 Co5 93.14(7) . . ? 
O8 Ca1 Co5 88.79(7) 1_455 . ? 
Co7 Ca1 Co5 78.07(2) . . ? 
O2 Ca1 Co7 103.90(7) 1_455 1_455 ? 
O5 Ca1 Co7 97.78(7) . 1_455 ? 
O12 Ca1 Co7 98.99(6) . 1_455 ? 
O10 Ca1 Co7 37.86(7) 1_455 1_455 ? 
O9 Ca1 Co7 37.29(6) 3_556 1_455 ? 
O11 Ca1 Co7 95.05(6) 4_565 1_455 ? 
O8 Ca1 Co7 159.50(8) . 1_455 ? 
O8 Ca1 Co7 40.31(6) 1_455 1_455 ? 
Co7 Ca1 Co7 117.88(3) . 1_455 ? 
Co5 Ca1 Co7 74.62(2) . 1_455 ? 
O2 Ca1 Ca2 152.81(8) 1_455 4_565 ? 
O5 Ca1 Ca2 105.36(8) . 4_565 ? 
O12 Ca1 Ca2 52.30(7) . 4_565 ? 
O10 Ca1 Ca2 51.47(6) 1_455 4_565 ? 
O9 Ca1 Ca2 49.50(7) 3_556 4_565 ? 
O11 Ca1 Ca2 47.74(6) 4_565 4_565 ? 
O8 Ca1 Ca2 100.49(8) . 4_565 ? 
O8 Ca1 Ca2 99.53(7) 1_455 4_565 ? 
Co7 Ca1 Ca2 58.48(2) . 4_565 ? 
Co5 Ca1 Ca2 62.71(3) . 4_565 ? 
Co7 Ca1 Ca2 59.40(2) 1_455 4_565 ? 
O1 Ca2 O6 97.46(11) 3_566 . ? 
O1 Ca2 O11 117.30(11) 3_566 . ? 
O6 Ca2 O11 136.10(10) . . ? 
O1 Ca2 O9 101.93(10) 3_566 2_556 ? 
O6 Ca2 O9 134.67(10) . 2_556 ? 
O11 Ca2 O9 65.93(9) . 2_556 ? 
O1 Ca2 O10 130.72(9) 3_566 4_465 ? 
O6 Ca2 O10 70.07(10) . 4_465 ? 
O11 Ca2 O10 101.44(10) . 4_465 ? 
O9 Ca2 O10 66.18(11) 2_556 4_465 ? 
O1 Ca2 O12 158.43(10) 3_566 4_565 ? 
O6 Ca2 O12 69.95(10) . 4_565 ? 
O11 Ca2 O12 68.24(11) . 4_565 ? 
O9 Ca2 O12 99.24(10) 2_556 4_565 ? 
O10 Ca2 O12 62.82(8) 4_465 4_565 ? 
O1 Ca2 O7 96.49(10) 3_566 . ? 
O6 Ca2 O7 82.63(10) . . ? 
O11 Ca2 O7 68.32(10) . . ? 
O9 Ca2 O7 134.19(9) 2_556 . ? 
O10 Ca2 O7 126.86(10) 4_465 . ? 
O12 Ca2 O7 65.26(9) 4_565 . ? 
O1 Ca2 O7 68.48(9) 3_566 1_455 ? 
O6 Ca2 O7 84.35(8) . 1_455 ? 
O11 Ca2 O7 131.57(10) . 1_455 ? 
O9 Ca2 O7 65.94(9) 2_556 1_455 ? 
O10 Ca2 O7 63.05(9) 4_465 1_455 ? 
O12 Ca2 O7 125.17(9) 4_565 1_455 ? 
O7 Ca2 O7 158.62(13) . 1_455 ? 
O1 Ca2 Co7 132.77(8) 3_566 4_565 ? 
O6 Ca2 Co7 97.59(7) . 4_565 ? 
O11 Ca2 Co7 39.18(7) . 4_565 ? 
O9 Ca2 Co7 98.46(6) 2_556 4_565 ? 
O10 Ca2 Co7 96.48(6) 4_465 4_565 ? 
O12 Ca2 Co7 38.21(6) 4_565 4_565 ? 
O7 Ca2 Co7 42.11(7) . 4_565 ? 
O7 Ca2 Co7 157.60(7) 1_455 4_565 ? 
O1 Ca2 Co6 137.54(8) 3_566 2 ? 
O6 Ca2 Co6 42.91(7) . 2 ? 
O11 Ca2 Co6 104.65(8) . 2 ? 
O9 Ca2 Co6 100.70(7) 2_556 2 ? 
O10 Ca2 Co6 37.26(7) 4_465 2 ? 
O12 Ca2 Co6 39.73(6) 4_565 2 ? 
O7 Ca2 Co6 92.81(7) . 2 ? 
O7 Ca2 Co6 89.10(7) 1_455 2 ? 
Co7 Ca2 Co6 77.74(2) 4_565 2 ? 
O1 Ca2 Co7 103.82(7) 3_566 4_465 ? 
O6 Ca2 Co7 98.36(7) . 4_465 ? 
O11 Ca2 Co7 98.32(6) . 4_465 ? 
O9 Ca2 Co7 37.29(7) 2_556 4_465 ? 
O10 Ca2 Co7 37.82(7) 4_465 4_465 ? 
O12 Ca2 Co7 95.52(6) 4_565 4_465 ? 
O7 Ca2 Co7 159.32(7) . 4_465 ? 
O7 Ca2 Co7 40.27(6) 1_455 4_465 ? 
Co7 Ca2 Co7 117.79(3) 4_565 4_465 ? 
Co6 Ca2 Co7 74.861(19) 2 4_465 ? 
O1 Ca2 Ca1 152.86(9) 3_566 4_565 ? 
O6 Ca2 Ca1 105.65(8) . 4_565 ? 
O11 Ca2 Ca1 52.02(6) . 4_565 ? 
O9 Ca2 Ca1 51.40(6) 2_556 4_565 ? 
O10 Ca2 Ca1 49.44(6) 4_465 4_565 ? 
O12 Ca2 Ca1 47.86(6) 4_565 4_565 ? 
O7 Ca2 Ca1 100.34(7) . 4_565 ? 
O7 Ca2 Ca1 99.47(7) 1_455 4_565 ? 
Co7 Ca2 Ca1 58.43(2) 4_565 4_565 ? 
Co6 Ca2 Ca1 62.82(3) 2 4_565 ? 
Co7 Ca2 Ca1 59.37(2) 4_465 4_565 ? 
O4 Ca3 O7 98.65(11) 3_665 . ? 
O4 Ca3 O12 100.74(10) 3_665 2_655 ? 
O7 Ca3 O12 135.12(10) . 2_655 ? 
O4 Ca3 O10 117.67(11) 3_665 2_655 ? 
O7 Ca3 O10 135.19(10) . 2_655 ? 
O12 Ca3 O10 65.45(8) 2_655 2_655 ? 
O4 Ca3 O12 160.17(10) 3_665 4_565 ? 
O7 Ca3 O12 69.43(10) . 4_565 ? 
O12 Ca3 O12 98.76(10) 2_655 4_565 ? 
O10 Ca3 O12 67.90(11) 2_655 4_565 ? 
O4 Ca3 O6 95.46(10) 3_665 . ? 
O7 Ca3 O6 83.66(10) . . ? 
O12 Ca3 O6 133.56(9) 2_655 . ? 
O10 Ca3 O6 68.45(9) 2_655 . ? 
O12 Ca3 O6 68.15(9) 4_565 . ? 
O4 Ca3 O10 129.83(9) 3_665 4_565 ? 
O7 Ca3 O10 69.03(10) . 4_565 ? 
O12 Ca3 O10 67.43(11) 2_655 4_565 ? 
O10 Ca3 O10 101.66(8) 2_655 4_565 ? 
O12 Ca3 O10 62.09(8) 4_565 4_565 ? 
O6 Ca3 O10 128.87(10) . 4_565 ? 
O4 Ca3 O6 68.78(9) 3_665 1_655 ? 
O7 Ca3 O6 83.04(8) . 1_655 ? 
O12 Ca3 O6 67.28(8) 2_655 1_655 ? 
O10 Ca3 O6 132.64(9) 2_655 1_655 ? 
O12 Ca3 O6 123.01(9) 4_565 1_655 ? 
O6 Ca3 O6 157.49(13) . 1_655 ? 
O10 Ca3 O6 61.65(8) 4_565 1_655 ? 
O4 Ca3 Co6 132.14(8) 3_665 2 ? 
O7 Ca3 Co6 98.40(7) . 2 ? 
O12 Ca3 Co6 97.81(6) 2_655 2 ? 
O10 Ca3 Co6 37.78(7) 2_655 2 ? 
O12 Ca3 Co6 40.29(6) 4_565 2 ? 
O6 Ca3 Co6 43.02(7) . 2 ? 
O10 Ca3 Co6 98.03(6) 4_565 2 ? 
O6 Ca3 Co6 157.83(7) 1_655 2 ? 
O4 Ca3 Co7 138.44(9) 3_665 4_565 ? 
O7 Ca3 Co7 42.16(8) . 4_565 ? 
O12 Ca3 Co7 102.33(7) 2_655 4_565 ? 
O10 Ca3 Co7 103.30(7) 2_655 4_565 ? 
O12 Ca3 Co7 37.91(6) 4_565 4_565 ? 
O6 Ca3 Co7 93.10(7) . 4_565 ? 
O10 Ca3 Co7 38.40(7) 4_565 4_565 ? 
O6 Ca3 Co7 89.14(6) 1_655 4_565 ? 
Co6 Ca3 Co7 77.80(2) 2 4_565 ? 
O4 Ca3 Co6 104.10(7) 3_665 2_655 ? 
O7 Ca3 Co6 96.89(7) . 2_655 ? 
O12 Ca3 Co6 39.09(7) 2_655 2_655 ? 
O10 Ca3 Co6 98.52(6) 2_655 2_655 ? 
O12 Ca3 Co6 93.29(6) 4_565 2_655 ? 
O6 Ca3 Co6 160.08(7) . 2_655 ? 
O10 Ca3 Co6 36.49(7) 4_565 2_655 ? 
O6 Ca3 Co6 40.60(6) 1_655 2_655 ? 
Co6 Ca3 Co6 117.70(3) 2 2_655 ? 
Co7 Ca3 Co6 74.792(18) 4_565 2_655 ? 
O4 Ca3 Ca3 151.37(9) 3_665 3_665 ? 
O7 Ca3 Ca3 104.88(9) . 3_665 ? 
O12 Ca3 Ca3 50.82(6) 2_655 3_665 ? 
O10 Ca3 Ca3 52.61(6) 2_655 3_665 ? 
O12 Ca3 Ca3 47.95(7) 4_565 3_665 ? 
O6 Ca3 Ca3 103.05(8) . 3_665 ? 
O10 Ca3 Ca3 49.05(6) 4_565 3_665 ? 
O6 Ca3 Ca3 97.88(7) 1_655 3_665 ? 
Co6 Ca3 Ca3 60.25(2) 2 3_665 ? 
Co7 Ca3 Ca3 62.72(3) 4_565 3_665 ? 
Co6 Ca3 Ca3 57.45(2) 2_655 3_665 ? 
O3 Ca4 O8 98.22(11) . . ? 
O3 Ca4 O11 101.07(10) . 2_646 ? 
O8 Ca4 O11 134.38(11) . 2_646 ? 
O3 Ca4 O9 117.68(11) . . ? 
O8 Ca4 O9 135.64(10) . . ? 
O11 Ca4 O9 65.93(9) 2_646 . ? 
O3 Ca4 O11 159.79(9) . 4_565 ? 
O8 Ca4 O11 70.06(11) . 4_565 ? 
O11 Ca4 O11 98.77(9) 2_646 4_565 ? 
O9 Ca4 O11 67.59(11) . 4_565 ? 
O3 Ca4 O5 95.42(10) . . ? 
O8 Ca4 O5 84.03(9) . . ? 
O11 Ca4 O5 133.97(10) 2_646 . ? 
O9 Ca4 O5 68.33(9) . . ? 
O11 Ca4 O5 67.64(9) 4_565 . ? 
O3 Ca4 O9 129.83(9) . 3_656 ? 
O8 Ca4 O9 68.67(10) . 3_656 ? 
O11 Ca4 O9 67.18(11) 2_646 3_656 ? 
O9 Ca4 O9 101.95(9) . 3_656 ? 
O11 Ca4 O9 62.53(8) 4_565 3_656 ? 
O5 Ca4 O9 128.70(9) . 3_656 ? 
O3 Ca4 O5 68.96(9) . 1_655 ? 
O8 Ca4 O5 82.85(9) . 1_655 ? 
O11 Ca4 O5 66.60(9) 2_646 1_655 ? 
O9 Ca4 O5 132.41(9) . 1_655 ? 
O11 Ca4 O5 123.49(9) 4_565 1_655 ? 
O5 Ca4 O5 157.82(13) . 1_655 ? 
O9 Ca4 O5 61.58(8) 3_656 1_655 ? 
O3 Ca4 Co5 132.03(8) . . ? 
O8 Ca4 Co5 98.64(7) . . ? 
O11 Ca4 Co5 98.32(6) 2_646 . ? 
O9 Ca4 Co5 38.00(7) . . ? 
O11 Ca4 Co5 39.75(7) 4_565 . ? 
O5 Ca4 Co5 42.74(7) . . ? 
O9 Ca4 Co5 98.13(5) 3_656 . ? 
O5 Ca4 Co5 157.80(7) 1_655 . ? 
O3 Ca4 Co7 138.13(9) . . ? 
O8 Ca4 Co7 42.29(8) . . ? 
O11 Ca4 Co7 101.73(8) 2_646 . ? 
O9 Ca4 Co7 103.62(7) . . ? 
O11 Ca4 Co7 38.71(7) 4_565 . ? 
O5 Ca4 Co7 93.41(7) . . ? 
O9 Ca4 Co7 37.91(6) 3_656 . ? 
O5 Ca4 Co7 88.84(7) 1_655 . ? 
Co5 Ca4 Co7 78.08(2) . . ? 
O3 Ca4 Co5 104.23(7) . 1_655 ? 
O8 Ca4 Co5 96.67(7) . 1_655 ? 
O11 Ca4 Co5 38.50(7) 2_646 1_655 ? 
O9 Ca4 Co5 98.57(6) . 1_655 ? 
O11 Ca4 Co5 93.70(6) 4_565 1_655 ? 
O5 Ca4 Co5 159.99(8) . 1_655 ? 
O9 Ca4 Co5 36.70(6) 3_656 1_655 ? 
O5 Ca4 Co5 40.39(6) 1_655 1_655 ? 
Co5 Ca4 Co5 117.87(3) . 1_655 ? 
Co7 Ca4 Co5 74.512(19) . 1_655 ? 
O3 Ca4 Ca4 151.71(9) . 3_656 ? 
O8 Ca4 Ca4 104.92(9) . 3_656 ? 
O11 Ca4 Ca4 50.86(6) 2_646 3_656 ? 
O9 Ca4 Ca4 52.74(6) . 3_656 ? 
O11 Ca4 Ca4 47.91(6) 4_565 3_656 ? 
O5 Ca4 Ca4 102.87(8) . 3_656 ? 
O9 Ca4 Ca4 49.21(6) 3_656 3_656 ? 
O5 Ca4 Ca4 97.75(7) 1_655 3_656 ? 
Co5 Ca4 Ca4 60.35(2) . 3_656 ? 
Co7 Ca4 Ca4 62.63(3) . 3_656 ? 
Co5 Ca4 Ca4 57.52(2) 1_655 3_656 ? 
O7 Co1 O7 132.4(2) 3_666 2_646 ? 
O7 Co1 O1 102.81(9) 3_666 . ? 
O7 Co1 O1 102.81(9) 2_646 . ? 
O7 Co1 O3 105.33(11) 3_666 . ? 
O7 Co1 O3 105.33(11) 2_646 . ? 
O1 Co1 O3 105.64(13) . . ? 
O7 Co1 Ca2 131.64(10) 3_666 2_546 ? 
O7 Co1 Ca2 59.29(9) 2_646 2_546 ? 
O1 Co1 Ca2 43.52(4) . 2_546 ? 
O3 Co1 Ca2 115.81(7) . 2_546 ? 
O7 Co1 Ca2 59.29(9) 3_666 3_566 ? 
O7 Co1 Ca2 131.64(10) 2_646 3_566 ? 
O1 Co1 Ca2 43.52(4) . 3_566 ? 
O3 Co1 Ca2 115.81(6) . 3_566 ? 
Ca2 Co1 Ca2 79.89(3) 2_546 3_566 ? 
O7 Co1 Ca4 148.63(11) 3_666 . ? 
O7 Co1 Ca4 71.46(10) 2_646 . ? 
O1 Co1 Ca4 87.51(8) . . ? 
O3 Co1 Ca4 43.38(4) . . ? 
Ca2 Co1 Ca4 75.428(18) 2_546 . ? 
Ca2 Co1 Ca4 124.79(3) 3_566 . ? 
O7 Co1 Ca4 71.46(10) 3_666 4_565 ? 
O7 Co1 Ca4 148.63(11) 2_646 4_565 ? 
O1 Co1 Ca4 87.51(8) . 4_565 ? 
O3 Co1 Ca4 43.38(4) . 4_565 ? 
Ca2 Co1 Ca4 124.79(3) 2_546 4_565 ? 
Ca2 Co1 Ca4 75.428(18) 3_566 4_565 ? 
Ca4 Co1 Ca4 79.62(3) . 4_565 ? 
O7 Co1 Ca2 43.90(9) 3_666 3_666 ? 
O7 Co1 Ca2 111.21(9) 2_646 3_666 ? 
O1 Co1 Ca2 143.746(14) . 3_666 ? 
O3 Co1 Ca2 77.55(7) . 3_666 ? 
Ca2 Co1 Ca2 164.56(4) 2_546 3_666 ? 
Ca2 Co1 Ca2 101.80(2) 3_566 3_666 ? 
Ca4 Co1 Ca2 114.53(3) . 3_666 ? 
Ca4 Co1 Ca2 69.993(18) 4_565 3_666 ? 
O7 Co1 Ca2 111.21(9) 3_666 2_646 ? 
O7 Co1 Ca2 43.90(9) 2_646 2_646 ? 
O1 Co1 Ca2 143.746(14) . 2_646 ? 
O3 Co1 Ca2 77.55(7) . 2_646 ? 
Ca2 Co1 Ca2 101.80(2) 2_546 2_646 ? 
Ca2 Co1 Ca2 164.56(4) 3_566 2_646 ? 
Ca4 Co1 Ca2 69.993(18) . 2_646 ? 
Ca4 Co1 Ca2 114.53(3) 4_565 2_646 ? 
Ca2 Co1 Ca2 72.51(3) 3_666 2_646 ? 
O7 Co1 Ca3 32.96(10) 3_666 3_666 ? 
O7 Co1 Ca3 102.23(11) 2_646 3_666 ? 
O1 Co1 Ca3 102.38(8) . 3_666 ? 
O3 Co1 Ca3 134.68(5) . 3_666 ? 
Ca2 Co1 Ca3 109.10(3) 2_546 3_666 ? 
Ca2 Co1 Ca3 65.794(18) 3_566 3_666 ? 
Ca4 Co1 Ca3 169.40(3) . 3_666 ? 
Ca4 Co1 Ca3 104.34(2) 4_565 3_666 ? 
Ca2 Co1 Ca3 59.077(17) 3_666 3_666 ? 
Ca2 Co1 Ca3 99.51(2) 2_646 3_666 ? 
O7 Co1 Ca3 102.23(11) 3_666 2_646 ? 
O7 Co1 Ca3 32.96(10) 2_646 2_646 ? 
O1 Co1 Ca3 102.38(8) . 2_646 ? 
O3 Co1 Ca3 134.68(5) . 2_646 ? 
Ca2 Co1 Ca3 65.794(18) 2_546 2_646 ? 
Ca2 Co1 Ca3 109.10(3) 3_566 2_646 ? 
Ca4 Co1 Ca3 104.34(2) . 2_646 ? 
Ca4 Co1 Ca3 169.40(3) 4_565 2_646 ? 
Ca2 Co1 Ca3 99.51(2) 3_666 2_646 ? 
Ca2 Co1 Ca3 59.077(17) 2_646 2_646 ? 
Ca3 Co1 Ca3 70.08(3) 3_666 2_646 ? 
O8 Co2 O8 131.6(2) . 4_565 ? 
O8 Co2 O2 103.16(10) . . ? 
O8 Co2 O2 103.16(10) 4_565 . ? 
O8 Co2 O4 105.59(10) . . ? 
O8 Co2 O4 105.59(10) 4_565 . ? 
O2 Co2 O4 105.28(14) . . ? 
O8 Co2 Ca1 131.69(9) . 4_665 ? 
O8 Co2 Ca1 59.58(9) 4_565 4_665 ? 
O2 Co2 Ca1 43.59(4) . 4_665 ? 
O4 Co2 Ca1 115.65(7) . 4_665 ? 
O8 Co2 Ca1 59.58(9) . 1_655 ? 
O8 Co2 Ca1 131.69(9) 4_565 1_655 ? 
O2 Co2 Ca1 43.59(4) . 1_655 ? 
O4 Co2 Ca1 115.65(7) . 1_655 ? 
Ca1 Co2 Ca1 79.91(3) 4_665 1_655 ? 
O8 Co2 Ca3 72.00(10) . 2_645 ? 
O8 Co2 Ca3 148.74(10) 4_565 2_645 ? 
O2 Co2 Ca3 87.23(8) . 2_645 ? 
O4 Co2 Ca3 43.22(4) . 2_645 ? 
Ca1 Co2 Ca3 124.58(3) 4_665 2_645 ? 
Ca1 Co2 Ca3 75.421(18) 1_655 2_645 ? 
O8 Co2 Ca3 148.73(10) . 3_665 ? 
O8 Co2 Ca3 72.01(10) 4_565 3_665 ? 
O2 Co2 Ca3 87.23(8) . 3_665 ? 
O4 Co2 Ca3 43.22(4) . 3_665 ? 
Ca1 Co2 Ca3 75.421(18) 4_665 3_665 ? 
Ca1 Co2 Ca3 124.58(3) 1_655 3_665 ? 
Ca3 Co2 Ca3 79.27(3) 2_645 3_665 ? 
O8 Co2 Ca1 43.65(9) . . ? 
O8 Co2 Ca1 110.74(10) 4_565 . ? 
O2 Co2 Ca1 143.791(14) . . ? 
O4 Co2 Ca1 77.89(7) . . ? 
Ca1 Co2 Ca1 164.38(4) 4_665 . ? 
Ca1 Co2 Ca1 101.79(2) 1_655 . ? 
Ca3 Co2 Ca1 70.387(18) 2_645 . ? 
Ca3 Co2 Ca1 114.71(2) 3_665 . ? 
O8 Co2 Ca1 110.74(10) . 4_565 ? 
O8 Co2 Ca1 43.65(9) 4_565 4_565 ? 
O2 Co2 Ca1 143.790(14) . 4_565 ? 
O4 Co2 Ca1 77.89(7) . 4_565 ? 
Ca1 Co2 Ca1 101.79(2) 4_665 4_565 ? 
Ca1 Co2 Ca1 164.38(4) 1_655 4_565 ? 
Ca3 Co2 Ca1 114.71(2) 2_645 4_565 ? 
Ca3 Co2 Ca1 70.386(17) 3_665 4_565 ? 
Ca1 Co2 Ca1 72.42(3) . 4_565 ? 
O8 Co2 Ca4 101.85(11) . 4_565 ? 
O8 Co2 Ca4 32.57(10) 4_565 4_565 ? 
O2 Co2 Ca4 102.69(8) . 4_565 ? 
O4 Co2 Ca4 134.64(6) . 4_565 ? 
Ca1 Co2 Ca4 65.947(18) 4_665 4_565 ? 
Ca1 Co2 Ca4 109.28(3) 1_655 4_565 ? 
Ca3 Co2 Ca4 169.45(3) 2_645 4_565 ? 
Ca3 Co2 Ca4 104.49(2) 3_665 4_565 ? 
Ca1 Co2 Ca4 99.19(3) . 4_565 ? 
Ca1 Co2 Ca4 58.739(17) 4_565 4_565 ? 
O8 Co2 Ca4 32.57(10) . . ? 
O8 Co2 Ca4 101.85(11) 4_565 . ? 
O2 Co2 Ca4 102.69(8) . . ? 
O4 Co2 Ca4 134.64(6) . . ? 
Ca1 Co2 Ca4 109.28(3) 4_665 . ? 
Ca1 Co2 Ca4 65.947(18) 1_655 . ? 
Ca3 Co2 Ca4 104.49(2) 2_645 . ? 
Ca3 Co2 Ca4 169.45(3) 3_665 . ? 
Ca1 Co2 Ca4 58.739(17) . . ? 
Ca1 Co2 Ca4 99.20(3) 4_565 . ? 
Ca4 Co2 Ca4 70.13(3) 4_565 . ? 
O6 Co3 O6 129.91(19) 2_545 3_565 ? 
O6 Co3 O2 105.60(10) 2_545 1_455 ? 
O6 Co3 O2 105.60(10) 3_565 1_455 ? 
O6 Co3 O4 105.32(9) 2_545 . ? 
O6 Co3 O4 105.32(9) 3_565 . ? 
O2 Co3 O4 101.96(13) 1_455 . ? 
O6 Co3 Ca3 133.39(10) 2_545 3_665 ? 
O6 Co3 Ca3 61.46(8) 3_565 3_665 ? 
O2 Co3 Ca3 113.77(7) 1_455 3_665 ? 
O4 Co3 Ca3 43.88(4) . 3_665 ? 
O6 Co3 Ca3 61.46(8) 2_545 2_645 ? 
O6 Co3 Ca3 133.39(10) 3_565 2_645 ? 
O2 Co3 Ca3 113.77(7) 1_455 2_645 ? 
O4 Co3 Ca3 43.88(4) . 2_645 ? 
Ca3 Co3 Ca3 80.01(3) 3_665 2_645 ? 
O6 Co3 Ca1 72.43(10) 2_545 . ? 
O6 Co3 Ca1 148.63(10) 3_565 . ? 
O2 Co3 Ca1 43.05(4) 1_455 . ? 
O4 Co3 Ca1 85.04(8) . . ? 
Ca3 Co3 Ca1 123.11(3) 3_665 . ? 
Ca3 Co3 Ca1 74.107(18) 2_645 . ? 
O6 Co3 Ca1 148.64(10) 2_545 4_565 ? 
O6 Co3 Ca1 72.43(10) 3_565 4_565 ? 
O2 Co3 Ca1 43.05(4) 1_455 4_565 ? 
O4 Co3 Ca1 85.04(8) . 4_565 ? 
Ca3 Co3 Ca1 74.106(18) 3_665 4_565 ? 
Ca3 Co3 Ca1 123.11(3) 2_645 4_565 ? 
Ca1 Co3 Ca1 79.26(3) . 4_565 ? 
O6 Co3 Ca3 42.01(8) 2_545 2_545 ? 
O6 Co3 Ca3 108.97(9) 3_565 2_545 ? 
O2 Co3 Ca3 79.62(7) 1_455 2_545 ? 
O4 Co3 Ca3 143.873(14) . 2_545 ? 
Ca3 Co3 Ca3 164.68(4) 3_665 2_545 ? 
Ca3 Co3 Ca3 101.93(2) 2_645 2_545 ? 
Ca1 Co3 Ca3 71.568(18) . 2_545 ? 
Ca1 Co3 Ca3 115.83(3) 4_565 2_545 ? 
O6 Co3 Ca3 108.97(9) 2_545 3_565 ? 
O6 Co3 Ca3 42.01(8) 3_565 3_565 ? 
O2 Co3 Ca3 79.62(7) 1_455 3_565 ? 
O4 Co3 Ca3 143.873(14) . 3_565 ? 
Ca3 Co3 Ca3 101.93(2) 3_665 3_565 ? 
Ca3 Co3 Ca3 164.68(4) 2_645 3_565 ? 
Ca1 Co3 Ca3 115.83(3) . 3_565 ? 
Ca1 Co3 Ca3 71.568(18) 4_565 3_565 ? 
Ca3 Co3 Ca3 72.23(3) 2_545 3_565 ? 
O6 Co3 Ca2 32.68(10) 2_545 2_545 ? 
O6 Co3 Ca2 101.61(10) 3_565 2_545 ? 
O2 Co3 Ca2 136.08(5) 1_455 2_545 ? 
O4 Co3 Ca2 103.27(8) . 2_545 ? 
Ca3 Co3 Ca2 109.38(3) 3_665 2_545 ? 
Ca3 Co3 Ca2 65.910(18) 2_645 2_545 ? 
Ca1 Co3 Ca2 104.68(2) . 2_545 ? 
Ca1 Co3 Ca2 170.98(3) 4_565 2_545 ? 
Ca3 Co3 Ca2 59.052(17) 2_545 2_545 ? 
Ca3 Co3 Ca2 99.45(2) 3_565 2_545 ? 
O6 Co3 Ca2 101.61(10) 2_545 3_565 ? 
O6 Co3 Ca2 32.68(10) 3_565 3_565 ? 
O2 Co3 Ca2 136.08(5) 1_455 3_565 ? 
O4 Co3 Ca2 103.27(8) . 3_565 ? 
Ca3 Co3 Ca2 65.910(18) 3_665 3_565 ? 
Ca3 Co3 Ca2 109.38(3) 2_645 3_565 ? 
Ca1 Co3 Ca2 170.98(3) . 3_565 ? 
Ca1 Co3 Ca2 104.68(2) 4_565 3_565 ? 
Ca3 Co3 Ca2 99.45(2) 2_545 3_565 ? 
Ca3 Co3 Ca2 59.052(17) 3_565 3_565 ? 
Ca2 Co3 Ca2 70.28(3) 2_545 3_565 ? 
O5 Co4 O5 130.7(2) 1_655 4_665 ? 
O5 Co4 O1 105.24(10) 1_655 1_655 ? 
O5 Co4 O1 105.24(10) 4_665 1_655 ? 
O5 Co4 O3 105.24(9) 1_655 . ? 
O5 Co4 O3 105.24(9) 4_665 . ? 
O1 Co4 O3 101.95(14) 1_655 . ? 
O5 Co4 Ca4 133.72(9) 1_655 4_565 ? 
O5 Co4 Ca4 61.26(8) 4_665 4_565 ? 
O1 Co4 Ca4 113.71(7) 1_655 4_565 ? 
O3 Co4 Ca4 44.01(4) . 4_565 ? 
O5 Co4 Ca4 61.26(8) 1_655 . ? 
O5 Co4 Ca4 133.72(9) 4_665 . ? 
O1 Co4 Ca4 113.71(7) 1_655 . ? 
O3 Co4 Ca4 44.01(4) . . ? 
Ca4 Co4 Ca4 80.31(3) 4_565 . ? 
O5 Co4 Ca2 148.49(10) 1_655 3_666 ? 
O5 Co4 Ca2 71.90(10) 4_665 3_666 ? 
O1 Co4 Ca2 43.27(4) 1_655 3_666 ? 
O3 Co4 Ca2 84.87(8) . 3_666 ? 
Ca4 Co4 Ca2 73.768(18) 4_565 3_666 ? 
Ca4 Co4 Ca2 123.08(3) . 3_666 ? 
O5 Co4 Ca2 71.90(10) 1_655 2_646 ? 
O5 Co4 Ca2 148.49(10) 4_665 2_646 ? 
O1 Co4 Ca2 43.27(4) 1_655 2_646 ? 
O3 Co4 Ca2 84.87(8) . 2_646 ? 
Ca4 Co4 Ca2 123.09(3) 4_565 2_646 ? 
Ca4 Co4 Ca2 73.768(18) . 2_646 ? 
Ca2 Co4 Ca2 79.58(3) 3_666 2_646 ? 
O5 Co4 Ca4 109.16(9) 1_655 4_665 ? 
O5 Co4 Ca4 42.02(8) 4_665 4_665 ? 
O1 Co4 Ca4 79.50(7) 1_655 4_665 ? 
O3 Co4 Ca4 143.872(14) . 4_665 ? 
Ca4 Co4 Ca4 101.81(2) 4_565 4_665 ? 
Ca4 Co4 Ca4 164.78(4) . 4_665 ? 
Ca2 Co4 Ca4 71.538(17) 3_666 4_665 ? 
Ca2 Co4 Ca4 115.96(2) 2_646 4_665 ? 
O5 Co4 Ca4 42.02(8) 1_655 1_655 ? 
O5 Co4 Ca4 109.16(9) 4_665 1_655 ? 
O1 Co4 Ca4 79.50(7) 1_655 1_655 ? 
O3 Co4 Ca4 143.872(14) . 1_655 ? 
Ca4 Co4 Ca4 164.78(4) 4_565 1_655 ? 
Ca4 Co4 Ca4 101.81(2) . 1_655 ? 
Ca2 Co4 Ca4 115.96(2) 3_666 1_655 ? 
Ca2 Co4 Ca4 71.538(17) 2_646 1_655 ? 
Ca4 Co4 Ca4 72.23(3) 4_665 1_655 ? 
O5 Co4 Ca1 32.93(10) 1_655 1_655 ? 
O5 Co4 Ca1 101.97(11) 4_665 1_655 ? 
O1 Co4 Ca1 135.76(5) 1_655 1_655 ? 
O3 Co4 Ca1 103.69(8) . 1_655 ? 
Ca4 Co4 Ca1 109.83(3) 4_565 1_655 ? 
Ca4 Co4 Ca1 66.197(18) . 1_655 ? 
Ca2 Co4 Ca1 170.72(3) 3_666 1_655 ? 
Ca2 Co4 Ca1 104.46(2) 2_646 1_655 ? 
Ca4 Co4 Ca1 99.22(3) 4_665 1_655 ? 
Ca4 Co4 Ca1 58.756(17) 1_655 1_655 ? 
O5 Co4 Ca1 101.97(11) 1_655 4_665 ? 
O5 Co4 Ca1 32.93(10) 4_665 4_665 ? 
O1 Co4 Ca1 135.76(5) 1_655 4_665 ? 
O3 Co4 Ca1 103.69(8) . 4_665 ? 
Ca4 Co4 Ca1 66.197(18) 4_565 4_665 ? 
Ca4 Co4 Ca1 109.83(3) . 4_665 ? 
Ca2 Co4 Ca1 104.46(2) 3_666 4_665 ? 
Ca2 Co4 Ca1 170.72(3) 2_646 4_665 ? 
Ca4 Co4 Ca1 58.756(17) 4_665 4_665 ? 
Ca4 Co4 Ca1 99.22(3) 1_655 4_665 ? 
Ca1 Co4 Ca1 70.33(3) 1_655 4_665 ? 
O9 Co5 O9 180.0 3_556 . ? 
O9 Co5 O11 87.52(13) 3_556 4_565 ? 
O9 Co5 O11 92.48(13) . 4_565 ? 
O9 Co5 O11 92.48(13) 3_556 2_546 ? 
O9 Co5 O11 87.52(13) . 2_546 ? 
O11 Co5 O11 180.0 4_565 2_546 ? 
O9 Co5 O5 89.91(10) 3_556 . ? 
O9 Co5 O5 90.09(10) . . ? 
O11 Co5 O5 87.77(10) 4_565 . ? 
O11 Co5 O5 92.23(10) 2_546 . ? 
O9 Co5 O5 90.09(10) 3_556 3_556 ? 
O9 Co5 O5 89.91(10) . 3_556 ? 
O11 Co5 O5 92.23(10) 4_565 3_556 ? 
O11 Co5 O5 87.77(10) 2_546 3_556 ? 
O5 Co5 O5 180.0 . 3_556 ? 
O9 Co5 Ca4 125.86(9) 3_556 . ? 
O9 Co5 Ca4 54.14(9) . . ? 
O11 Co5 Ca4 55.04(8) 4_565 . ? 
O11 Co5 Ca4 124.96(8) 2_546 . ? 
O5 Co5 Ca4 55.39(7) . . ? 
O5 Co5 Ca4 124.61(7) 3_556 . ? 
O9 Co5 Ca4 54.14(9) 3_556 3_556 ? 
O9 Co5 Ca4 125.86(9) . 3_556 ? 
O11 Co5 Ca4 124.96(8) 4_565 3_556 ? 
O11 Co5 Ca4 55.04(8) 2_546 3_556 ? 
O5 Co5 Ca4 124.61(7) . 3_556 ? 
O5 Co5 Ca4 55.39(7) 3_556 3_556 ? 
Ca4 Co5 Ca4 179.999(13) . 3_556 ? 
O9 Co5 Ca1 124.43(8) 3_556 3_556 ? 
O9 Co5 Ca1 55.57(8) . 3_556 ? 
O11 Co5 Ca1 124.22(8) 4_565 3_556 ? 
O11 Co5 Ca1 55.78(8) 2_546 3_556 ? 
O5 Co5 Ca1 130.25(9) . 3_556 ? 
O5 Co5 Ca1 49.75(9) 3_556 3_556 ? 
Ca4 Co5 Ca1 109.415(18) . 3_556 ? 
Ca4 Co5 Ca1 70.585(18) 3_556 3_556 ? 
O9 Co5 Ca1 55.57(8) 3_556 . ? 
O9 Co5 Ca1 124.43(8) . . ? 
O11 Co5 Ca1 55.78(8) 4_565 . ? 
O11 Co5 Ca1 124.22(8) 2_546 . ? 
O5 Co5 Ca1 49.75(9) . . ? 
O5 Co5 Ca1 130.25(9) 3_556 . ? 
Ca4 Co5 Ca1 70.585(18) . . ? 
Ca4 Co5 Ca1 109.416(18) 3_556 . ? 
Ca1 Co5 Ca1 180.0 3_556 . ? 
O9 Co5 Ca4 55.77(8) 3_556 1_455 ? 
O9 Co5 Ca4 124.23(8) . 1_455 ? 
O11 Co5 Ca4 130.23(8) 4_565 1_455 ? 
O11 Co5 Ca4 49.77(8) 2_546 1_455 ? 
O5 Co5 Ca4 62.76(7) . 1_455 ? 
O5 Co5 Ca4 117.24(7) 3_556 1_455 ? 
Ca4 Co5 Ca4 117.87(3) . 1_455 ? 
Ca4 Co5 Ca4 62.13(3) 3_556 1_455 ? 
Ca1 Co5 Ca4 105.001(18) 3_556 1_455 ? 
Ca1 Co5 Ca4 74.998(18) . 1_455 ? 
O9 Co5 Ca4 124.23(8) 3_556 3_656 ? 
O9 Co5 Ca4 55.77(8) . 3_656 ? 
O11 Co5 Ca4 49.77(8) 4_565 3_656 ? 
O11 Co5 Ca4 130.23(8) 2_546 3_656 ? 
O5 Co5 Ca4 117.24(7) . 3_656 ? 
O5 Co5 Ca4 62.76(7) 3_556 3_656 ? 
Ca4 Co5 Ca4 62.13(3) . 3_656 ? 
Ca4 Co5 Ca4 117.87(3) 3_556 3_656 ? 
Ca1 Co5 Ca4 74.999(18) 3_556 3_656 ? 
Ca1 Co5 Ca4 105.002(18) . 3_656 ? 
Ca4 Co5 Ca4 180.0 1_455 3_656 ? 
O10 Co6 O10 180.00(18) 3_655 1_455 ? 
O10 Co6 O12 92.52(13) 3_655 . ? 
O10 Co6 O12 87.48(13) 1_455 . ? 
O10 Co6 O12 87.48(13) 3_655 3 ? 
O10 Co6 O12 92.52(13) 1_455 3 ? 
O12 Co6 O12 180.0 . 3 ? 
O10 Co6 O6 89.95(11) 3_655 4_565 ? 
O10 Co6 O6 90.05(11) 1_455 4_565 ? 
O12 Co6 O6 87.48(10) . 4_565 ? 
O12 Co6 O6 92.52(10) 3 4_565 ? 
O10 Co6 O6 90.05(11) 3_655 2_545 ? 
O10 Co6 O6 89.95(11) 1_455 2_545 ? 
O12 Co6 O6 92.52(10) . 2_545 ? 
O12 Co6 O6 87.48(10) 3 2_545 ? 
O6 Co6 O6 180.0(2) 4_565 2_545 ? 
O10 Co6 Ca3 125.95(8) 3_655 2_545 ? 
O10 Co6 Ca3 54.05(8) 1_455 2_545 ? 
O12 Co6 Ca3 124.90(7) . 2_545 ? 
O12 Co6 Ca3 55.10(7) 3 2_545 ? 
O6 Co6 Ca3 124.86(7) 4_565 2_545 ? 
O6 Co6 Ca3 55.14(7) 2_545 2_545 ? 
O10 Co6 Ca3 54.05(8) 3_655 4_565 ? 
O10 Co6 Ca3 125.95(8) 1_455 4_565 ? 
O12 Co6 Ca3 55.10(7) . 4_565 ? 
O12 Co6 Ca3 124.90(7) 3 4_565 ? 
O6 Co6 Ca3 55.14(7) 4_565 4_565 ? 
O6 Co6 Ca3 124.86(7) 2_545 4_565 ? 
Ca3 Co6 Ca3 180.00(3) 2_545 4_565 ? 
O10 Co6 Ca2 55.48(8) 3_655 2_545 ? 
O10 Co6 Ca2 124.52(8) 1_455 2_545 ? 
O12 Co6 Ca2 124.08(8) . 2_545 ? 
O12 Co6 Ca2 55.92(8) 3 2_545 ? 
O6 Co6 Ca2 130.41(8) 4_565 2_545 ? 
O6 Co6 Ca2 49.59(8) 2_545 2_545 ? 
Ca3 Co6 Ca2 70.777(18) 2_545 2_545 ? 
Ca3 Co6 Ca2 109.223(18) 4_565 2_545 ? 
O10 Co6 Ca2 124.52(8) 3_655 4_565 ? 
O10 Co6 Ca2 55.48(8) 1_455 4_565 ? 
O12 Co6 Ca2 55.92(8) . 4_565 ? 
O12 Co6 Ca2 124.08(8) 3 4_565 ? 
O6 Co6 Ca2 49.59(8) 4_565 4_565 ? 
O6 Co6 Ca2 130.41(8) 2_545 4_565 ? 
Ca3 Co6 Ca2 109.223(18) 2_545 4_565 ? 
Ca3 Co6 Ca2 70.777(18) 4_565 4_565 ? 
Ca2 Co6 Ca2 180.00(4) 2_545 4_565 ? 
O10 Co6 Ca3 124.24(8) 3_655 4_465 ? 
O10 Co6 Ca3 55.76(8) 1_455 4_465 ? 
O12 Co6 Ca3 130.01(9) . 4_465 ? 
O12 Co6 Ca3 50.00(9) 3 4_465 ? 
O6 Co6 Ca3 62.85(7) 4_565 4_465 ? 
O6 Co6 Ca3 117.15(7) 2_545 4_465 ? 
Ca3 Co6 Ca3 62.30(3) 2_545 4_465 ? 
Ca3 Co6 Ca3 117.70(3) 4_565 4_465 ? 
Ca2 Co6 Ca3 105.386(18) 2_545 4_465 ? 
Ca2 Co6 Ca3 74.614(18) 4_565 4_465 ? 
O10 Co6 Ca3 55.76(8) 3_655 2_645 ? 
O10 Co6 Ca3 124.24(8) 1_455 2_645 ? 
O12 Co6 Ca3 49.99(9) . 2_645 ? 
O12 Co6 Ca3 130.00(9) 3 2_645 ? 
O6 Co6 Ca3 117.15(7) 4_565 2_645 ? 
O6 Co6 Ca3 62.85(7) 2_545 2_645 ? 
Ca3 Co6 Ca3 117.70(3) 2_545 2_645 ? 
Ca3 Co6 Ca3 62.30(3) 4_565 2_645 ? 
Ca2 Co6 Ca3 74.614(18) 2_545 2_645 ? 
Ca2 Co6 Ca3 105.386(18) 4_565 2_645 ? 
Ca3 Co6 Ca3 180.00(3) 4_465 2_645 ? 
O12 Co7 O9 177.65(9) . 3_656 ? 
O12 Co7 O10 87.32(13) . . ? 
O9 Co7 O10 91.54(13) 3_656 . ? 
O12 Co7 O11 93.61(13) . 4_565 ? 
O9 Co7 O11 87.60(13) 3_656 4_565 ? 
O10 Co7 O11 177.87(9) . 4_565 ? 
O12 Co7 O7 88.60(11) . 4_565 ? 
O9 Co7 O7 93.44(10) 3_656 4_565 ? 
O10 Co7 O7 89.43(11) . 4_565 ? 
O11 Co7 O7 88.67(11) 4_565 4_565 ? 
O12 Co7 O8 88.65(10) . . ? 
O9 Co7 O8 89.38(10) 3_656 . ? 
O10 Co7 O8 93.69(11) . . ? 
O11 Co7 O8 88.25(11) 4_565 . ? 
O7 Co7 O8 175.74(8) 4_565 . ? 
O12 Co7 Ca1 52.05(9) . . ? 
O9 Co7 Ca1 127.49(9) 3_656 . ? 
O10 Co7 Ca1 125.48(8) . . ? 
O11 Co7 Ca1 56.44(8) 4_565 . ? 
O7 Co7 Ca1 119.34(7) 4_565 . ? 
O8 Co7 Ca1 56.42(7) . . ? 
O12 Co7 Ca2 56.88(8) . 4_565 ? 
O9 Co7 Ca2 125.32(8) 3_656 4_565 ? 
O10 Co7 Ca2 127.64(8) . 4_565 ? 
O11 Co7 Ca2 51.75(8) 4_565 4_565 ? 
O7 Co7 Ca2 56.53(7) 4_565 4_565 ? 
O8 Co7 Ca2 119.20(8) . 4_565 ? 
Ca1 Co7 Ca2 63.09(2) . 4_565 ? 
O12 Co7 Ca4 122.12(8) . . ? 
O9 Co7 Ca4 57.16(9) 3_656 . ? 
O10 Co7 Ca4 126.59(8) . . ? 
O11 Co7 Ca4 54.34(8) 4_565 . ? 
O7 Co7 Ca4 129.97(9) 4_565 . ? 
O8 Co7 Ca4 49.61(9) . . ? 
Ca1 Co7 Ca4 70.49(2) . . ? 
Ca2 Co7 Ca4 105.43(2) 4_565 . ? 
O12 Co7 Ca3 54.51(8) . 4_565 ? 
O9 Co7 Ca3 126.33(9) 3_656 4_565 ? 
O10 Co7 Ca3 57.05(8) . 4_565 ? 
O11 Co7 Ca3 122.11(8) 4_565 4_565 ? 
O7 Co7 Ca3 49.67(9) 4_565 4_565 ? 
O8 Co7 Ca3 130.34(9) . 4_565 ? 
Ca1 Co7 Ca3 105.82(2) . 4_565 ? 
Ca2 Co7 Ca3 70.751(19) 4_565 4_565 ? 
Ca4 Co7 Ca3 175.797(19) . 4_565 ? 
O12 Co7 Ca1 123.67(9) . 1_655 ? 
O9 Co7 Ca1 54.15(8) 3_656 1_655 ? 
O10 Co7 Ca1 52.02(8) . 1_655 ? 
O11 Co7 Ca1 128.54(8) 4_565 1_655 ? 
O7 Co7 Ca1 122.50(8) 4_565 1_655 ? 
O8 Co7 Ca1 61.76(8) . 1_655 ? 
Ca1 Co7 Ca1 117.88(3) . 1_655 ? 
Ca2 Co7 Ca1 179.02(2) 4_565 1_655 ? 
Ca4 Co7 Ca1 75.019(19) . 1_655 ? 
Ca3 Co7 Ca1 108.83(2) 4_565 1_655 ? 
O12 Co7 Ca2 128.36(9) . 4_665 ? 
O9 Co7 Ca2 52.06(9) 3_656 4_665 ? 
O10 Co7 Ca2 54.18(8) . 4_665 ? 
O11 Co7 Ca2 123.92(8) 4_565 4_665 ? 
O7 Co7 Ca2 61.54(7) 4_565 4_665 ? 
O8 Co7 Ca2 122.70(8) . 4_665 ? 
Ca1 Co7 Ca2 179.12(2) . 4_665 ? 
Ca2 Co7 Ca2 117.79(3) 4_565 4_665 ? 
Ca4 Co7 Ca2 109.00(2) . 4_665 ? 
Ca3 Co7 Ca2 74.71(2) 4_565 4_665 ? 
Ca1 Co7 Ca2 61.23(2) 1_655 4_665 ? 
Co1 O1 Co4 120.48(17) . 1_455 ? 
Co1 O1 Ca2 101.43(8) . 3_566 ? 
Co4 O1 Ca2 101.83(8) 1_455 3_566 ? 
Co1 O1 Ca2 101.43(8) . 2_546 ? 
Co4 O1 Ca2 101.83(8) 1_455 2_546 ? 
Ca2 O1 Ca2 132.08(16) 3_566 2_546 ? 
Co2 O2 Co3 120.45(16) . 1_655 ? 
Co2 O2 Ca1 101.19(9) . 4_665 ? 
Co3 O2 Ca1 102.09(9) 1_655 4_665 ? 
Co2 O2 Ca1 101.19(9) . 1_655 ? 
Co3 O2 Ca1 102.09(9) 1_655 1_655 ? 
Ca1 O2 Ca1 132.04(15) 4_665 1_655 ? 
Co1 O3 Co4 124.17(16) . . ? 
Co1 O3 Ca4 101.65(9) . . ? 
Co4 O3 Ca4 100.37(9) . . ? 
Co1 O3 Ca4 101.65(9) . 4_565 ? 
Co4 O3 Ca4 100.37(9) . 4_565 ? 
Ca4 O3 Ca4 131.83(15) . 4_565 ? 
Co2 O4 Co3 123.77(17) . . ? 
Co2 O4 Ca3 101.80(8) . 2_645 ? 
Co3 O4 Ca3 100.51(8) . 2_645 ? 
Co2 O4 Ca3 101.80(8) . 3_665 ? 
Co3 O4 Ca3 100.51(8) . 3_665 ? 
Ca3 O4 Ca3 131.52(15) 2_645 3_665 ? 
Co4 O5 Co5 145.90(18) 1_455 . ? 
Co4 O5 Ca1 122.50(16) 1_455 . ? 
Co5 O5 Ca1 87.54(11) . . ? 
Co4 O5 Ca4 109.63(13) 1_455 . ? 
Co5 O5 Ca4 81.87(9) . . ? 
Ca1 O5 Ca4 92.77(10) . . ? 
Co4 O5 Ca4 85.39(10) 1_455 1_455 ? 
Co5 O5 Ca4 76.85(8) . 1_455 ? 
Ca1 O5 Ca4 92.48(9) . 1_455 ? 
Ca4 O5 Ca4 157.82(13) . 1_455 ? 
Co3 O6 Co6 145.19(16) 3_565 2 ? 
Co3 O6 Ca2 123.04(15) 3_565 . ? 
Co6 O6 Ca2 87.50(11) 2 . ? 
Co3 O6 Ca3 109.69(13) 3_565 . ? 
Co6 O6 Ca3 81.84(9) 2 . ? 
Ca2 O6 Ca3 93.39(9) . . ? 
Co3 O6 Ca3 85.36(9) 3_565 1_455 ? 
Co6 O6 Ca3 76.55(8) 2 1_455 ? 
Ca2 O6 Ca3 91.92(9) . 1_455 ? 
Ca3 O6 Ca3 157.49(13) . 1_455 ? 
Co1 O7 Co7 147.11(18) 3_666 4_565 ? 
Co1 O7 Ca3 122.35(16) 3_666 . ? 
Co7 O7 Ca3 88.17(12) 4_565 . ? 
Co1 O7 Ca2 107.04(13) 3_666 . ? 
Co7 O7 Ca2 81.36(10) 4_565 . ? 
Ca3 O7 Ca2 92.15(9) . . ? 
Co1 O7 Ca2 87.27(10) 3_666 1_655 ? 
Co7 O7 Ca2 78.19(9) 4_565 1_655 ? 
Ca3 O7 Ca2 93.37(10) . 1_655 ? 
Ca2 O7 Ca2 158.62(13) . 1_655 ? 
Co2 O8 Co7 146.44(18) . . ? 
Co2 O8 Ca4 122.98(16) . . ? 
Co7 O8 Ca4 88.10(12) . . ? 
Co2 O8 Ca1 107.36(13) . . ? 
Co7 O8 Ca1 81.37(9) . . ? 
Ca4 O8 Ca1 91.90(10) . . ? 
Co2 O8 Ca1 86.98(10) . 1_655 ? 
Co7 O8 Ca1 77.93(9) . 1_655 ? 
Ca4 O8 Ca1 93.63(9) . 1_655 ? 
Ca1 O8 Ca1 158.36(14) . 1_655 ? 
Co5 O9 Co7 170.85(14) . 3_656 ? 
Co5 O9 Ca4 87.85(13) . . ? 
Co7 O9 Ca4 95.65(9) 3_656 . ? 
Co5 O9 Ca2 96.28(9) . 2_546 ? 
Co7 O9 Ca2 90.66(13) 3_656 2_546 ? 
Ca4 O9 Ca2 108.35(9) . 2_546 ? 
Co5 O9 Ca1 86.89(8) . 3_556 ? 
Co7 O9 Ca1 88.56(12) 3_656 3_556 ? 
Ca4 O9 Ca1 171.33(14) . 3_556 ? 
Ca2 O9 Ca1 79.10(9) 2_546 3_556 ? 
Co5 O9 Ca4 87.53(12) . 3_656 ? 
Co7 O9 Ca4 84.94(8) 3_656 3_656 ? 
Ca4 O9 Ca4 78.05(9) . 3_656 ? 
Ca2 O9 Ca4 172.61(14) 2_546 3_656 ? 
Ca1 O9 Ca4 94.83(8) 3_556 3_656 ? 
Co6 O10 Co7 170.63(14) 1_655 . ? 
Co6 O10 Ca3 88.16(13) 1_655 2_645 ? 
Co7 O10 Ca3 95.49(9) . 2_645 ? 
Co6 O10 Ca1 96.91(10) 1_655 1_655 ? 
Co7 O10 Ca1 90.12(12) . 1_655 ? 
Ca3 O10 Ca1 108.51(9) 2_645 1_655 ? 
Co6 O10 Ca2 87.26(8) 1_655 4_665 ? 
Co7 O10 Ca2 88.01(12) . 4_665 ? 
Ca3 O10 Ca2 171.57(14) 2_645 4_665 ? 
Ca1 O10 Ca2 79.09(9) 1_655 4_665 ? 
Co6 O10 Ca3 87.76(12) 1_655 4_565 ? 
Co7 O10 Ca3 84.55(9) . 4_565 ? 
Ca3 O10 Ca3 78.34(8) 2_645 4_565 ? 
Ca1 O10 Ca3 171.75(14) 1_655 4_565 ? 
Ca2 O10 Ca3 94.40(8) 4_665 4_565 ? 
Co7 O11 Co5 167.03(14) 4_565 2_556 ? 
Co7 O11 Ca4 97.28(10) 4_565 2_656 ? 
Co5 O11 Ca4 91.73(13) 2_556 2_656 ? 
Co7 O11 Ca2 89.07(13) 4_565 . ? 
Co5 O11 Ca2 96.64(9) 2_556 . ? 
Ca4 O11 Ca2 109.90(9) 2_656 . ? 
Co7 O11 Ca4 86.96(9) 4_565 4_565 ? 
Co5 O11 Ca4 85.22(11) 2_556 4_565 ? 
Ca4 O11 Ca4 81.24(9) 2_656 4_565 ? 
Ca2 O11 Ca4 168.59(13) . 4_565 ? 
Co7 O11 Ca1 84.55(11) 4_565 4_565 ? 
Co5 O11 Ca1 84.95(8) 2_556 4_565 ? 
Ca4 O11 Ca1 169.67(13) 2_656 4_565 ? 
Ca2 O11 Ca1 80.24(9) . 4_565 ? 
Ca4 O11 Ca1 88.73(8) 4_565 4_565 ? 
Co7 O12 Co6 166.84(14) . . ? 
Co7 O12 Ca1 89.54(13) . . ? 
Co6 O12 Ca1 96.02(9) . . ? 
Co7 O12 Ca3 98.36(10) . 2_645 ? 
Co6 O12 Ca3 90.92(13) . 2_645 ? 
Ca1 O12 Ca3 110.28(9) . 2_645 ? 
Co7 O12 Ca3 87.58(8) . 4_565 ? 
Co6 O12 Ca3 84.61(11) . 4_565 ? 
Ca1 O12 Ca3 168.43(13) . 4_565 ? 
Ca3 O12 Ca3 81.24(10) 2_645 4_565 ? 
Co7 O12 Ca2 84.91(11) . 4_565 ? 
Co6 O12 Ca2 84.35(8) . 4_565 ? 
Ca1 O12 Ca2 79.84(10) . 4_565 ? 
Ca3 O12 Ca2 169.29(13) 2_645 4_565 ? 
Ca3 O12 Ca2 88.74(7) 4_565 4_565 ? 
 
_diffrn_measured_fraction_theta_max    0.996 
_diffrn_reflns_theta_full              31.50 
_diffrn_measured_fraction_theta_full   0.996 
_refine_diff_density_max    0.803 
_refine_diff_density_min   -0.958 
_refine_diff_density_rms    0.168 
